# Supplementary material for: PdO@CoSe2 composites: efficient electrocatalysts for water oxidation in alkaline media
Source: Royal Society of Chemistry journal article supplement (doi:10.1039/d2ra07340d), 2023-01-01
Supplement: d2ra07340d1.pdf [file d2ra07340d1.pdf]

1 **Supplementary Information**

2  
3 **PdO@CoSe<sub>2</sub> Composites: An Efficient Electrocatalysts for Water Oxidation**  
4 **in Alkaline Media**

5 Abdul Hanan<sup>a</sup>, Muhammad Yameen Solangi<sup>b</sup>, Abdul Jaleel Iaghari<sup>b</sup>, Aqeel Ahmed Shah<sup>c</sup>, Umair  
6 Aftab<sup>\*,b</sup>, Zahoor Ahmed Ibupoto, Muhammad Ishaque Abro<sup>b</sup>, Muhammad Nazim Lakhani<sup>a</sup>, Irfan  
7 Ali<sup>d</sup>, Elmuez A. Dawid<sup>e</sup>, Abd Al Karim Haj Ismail<sup>e</sup>, Elfathi Mustafaf<sup>f</sup>, Brigitte Vigolo<sup>h</sup>, Aneela  
8 Tahira<sup>i</sup>, Zafar Hussain Ibupoto<sup>\*,g</sup>

9 <sup>a</sup>Key Laboratory of Superlight Material and Surface Technology, Ministry of Education, College  
10 of Materials Science and Chemical Engineering, Harbin Engineering University, 150001,  
11 Harbin, PR China.

12 <sup>b</sup>Department of Metallurgy and Materials Engineering, Mehran University of Engineering and  
13 Technology, 76080, Jamshoro, Pakistan.

14 <sup>c</sup>NED University of Engineering and Technology, 75270, Karachi, Pakistan.

15 <sup>d</sup>Institute of Computational Chemistry, College of Chemistry, Beijing University of Chemical  
16 Technology, 100029, Beijing, PR China.

17 <sup>e</sup>Nonlinear Dynamics Research Centre (NDRC), Ajman University, P.O. Box 346, United Arab  
18 Emirates.

19 <sup>f</sup>Department of Science and Technology (ITN), Linköping University, Campus Norrköping,  
20 60174 Norrköping, Sweden

21 <sup>g</sup>Dr. M.A Kazi Institute of Chemistry University of Sindh, Jamshoro, 76080, Pakistan

22 <sup>h</sup>Université de Lorraine, CNRS, IJL, F-54000 Nancy, France

23 <sup>i</sup>Institute of Chemistry, Shah Abdul Latif University Khairpur Mirs, Sindh, Pakistan

24

25 **Corresponding author(s):** Zafar Hussain Ibupoto and Umair Aftab

26 **E-mail:** [zaffar.ibhupoto@usindh.edu.pk](mailto:zaffar.ibhupoto@usindh.edu.pk), [umair.aftab@faculty.muets.edu.pk](mailto:umair.aftab@faculty.muets.edu.pk)

27

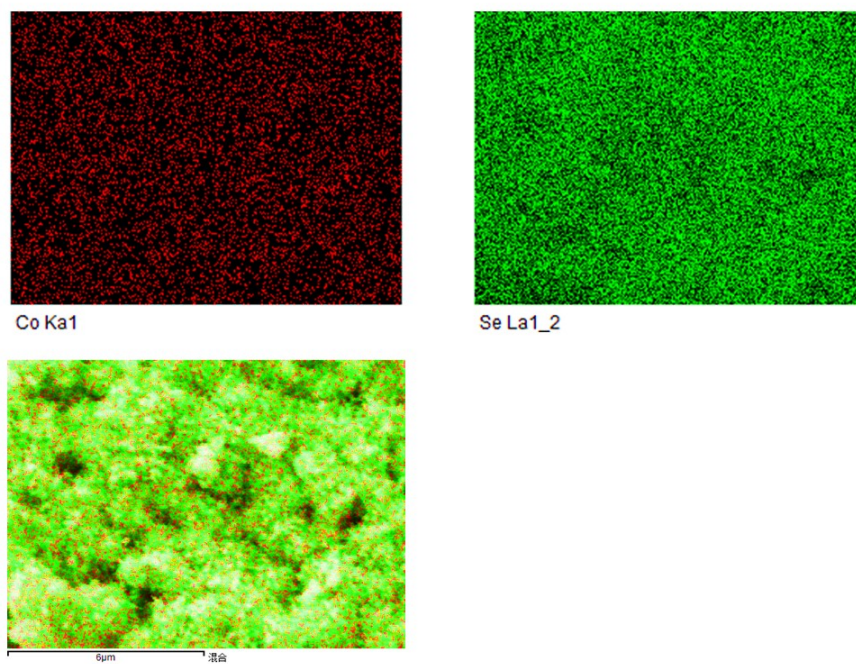

**Fig. S1** The elemental mapping of CoSe<sub>2</sub> pristine

28

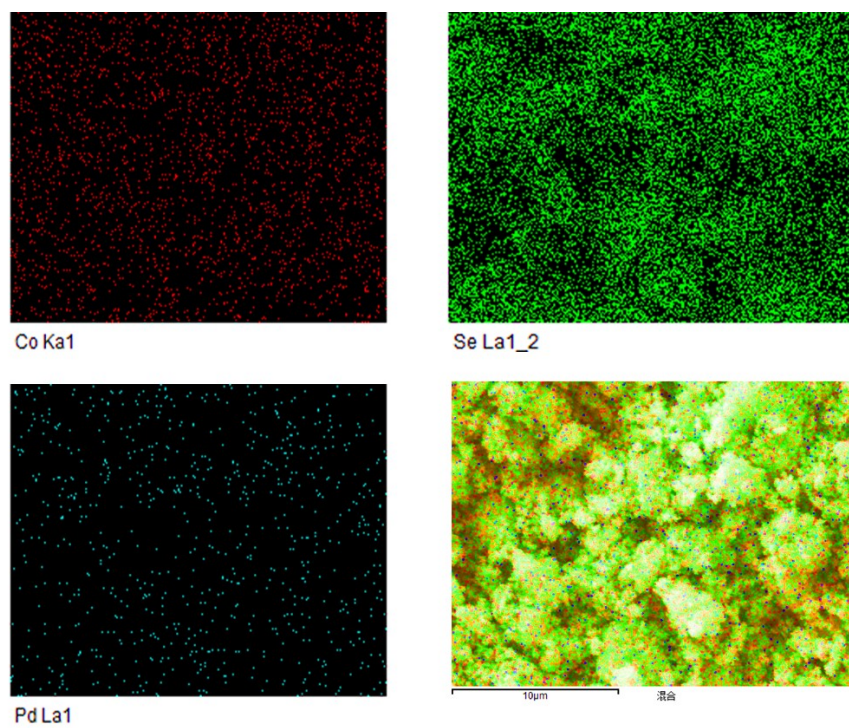

**Fig. S2** The elemental mapping of CSPd-2 nanostructure<sub>2</sub>

29

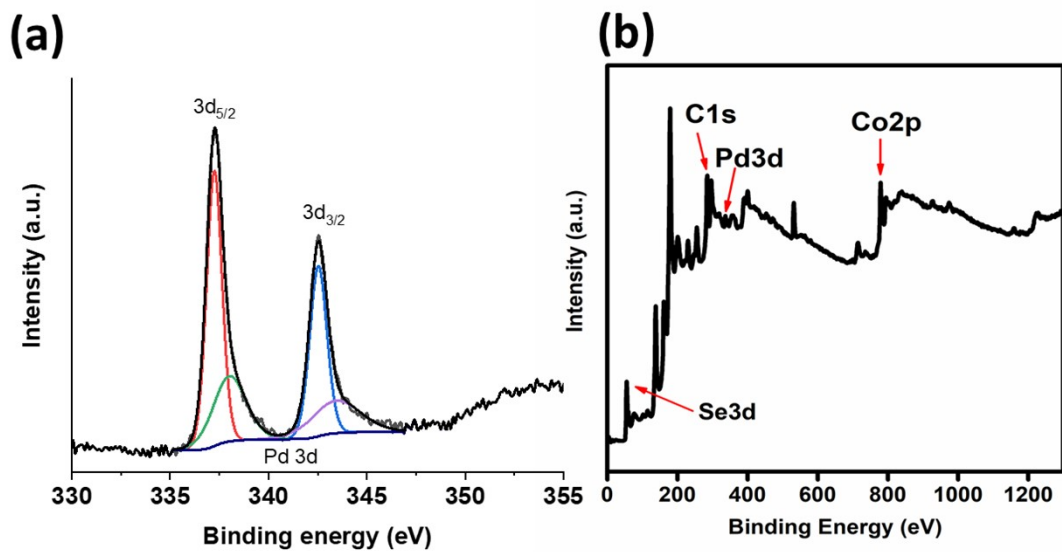

**Fig. S3** (a) Pd3d XPS spectra of CSPD-2 and (b) Main survey XPS analysis of CSPd-2 composite materials

30

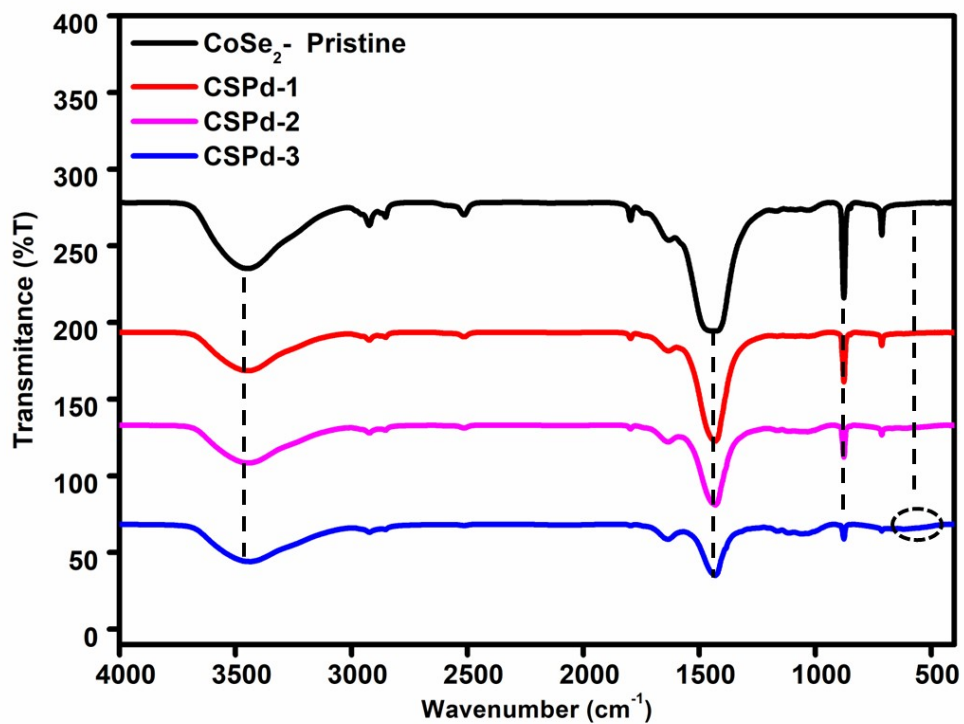

**Fig. S4** FTIR spectra of various nanostructures CoSe<sub>2</sub>, CSPd-1, CSPd-2 and CSPd-3

31

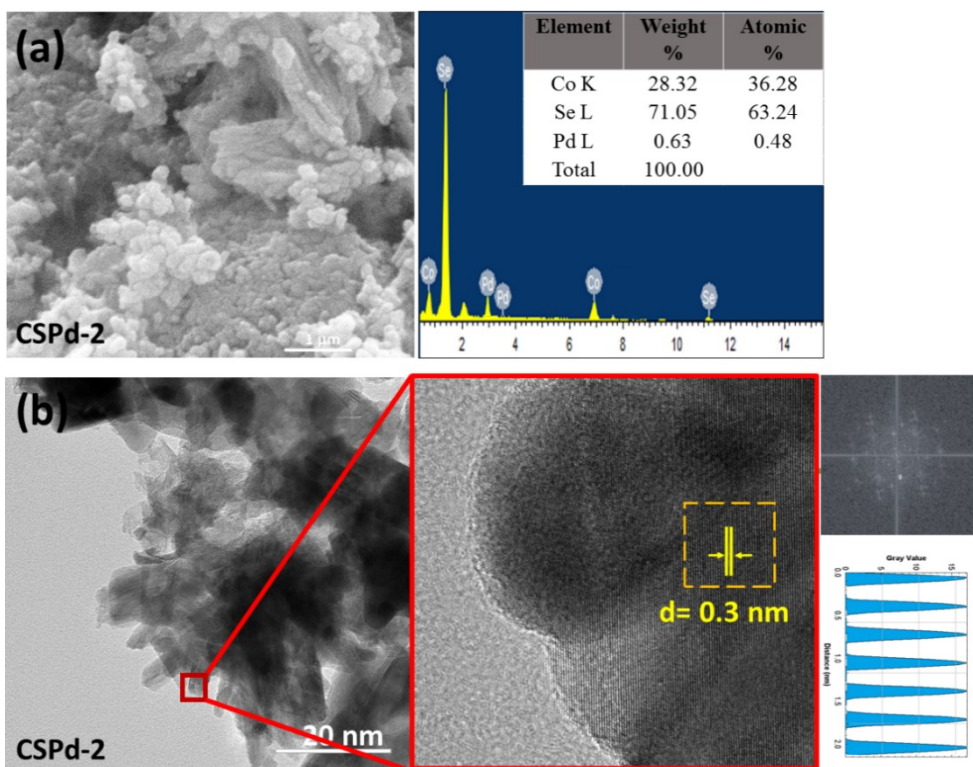

Fig. S5 (a) SEM and EDS results after chronopotentiometry for sample CSPd-2 (b) HRTEM image with relevant FFT and lattice fringes calculation

32

33

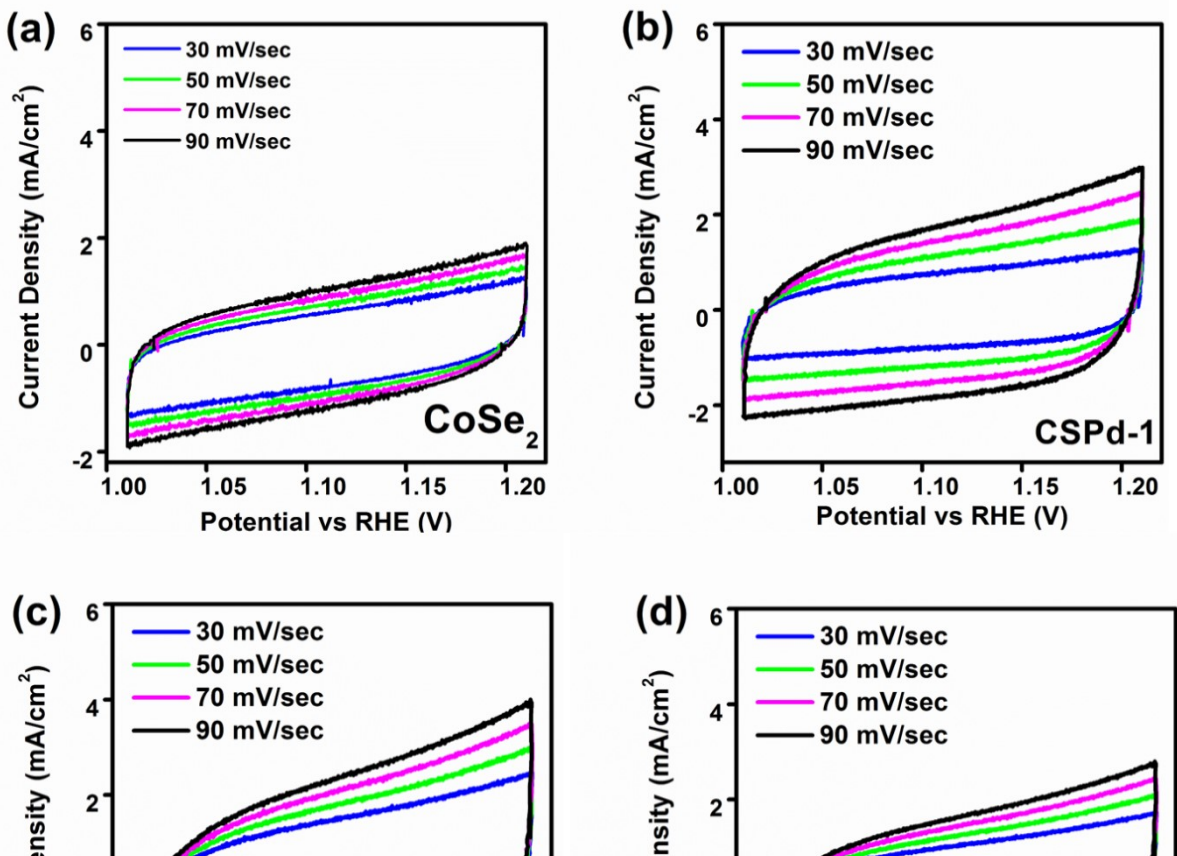



**Table S1.** Comparison with previously reported work toward OER

| Catalyst                                                                                 | Electrolyte  | Overpotential | Tafel slope | Reference No.    |
|------------------------------------------------------------------------------------------|--------------|---------------|-------------|------------------|
|                                                                                          | KOH          | mV            | mV/Dec      |                  |
| <b>CSPd-2</b>                                                                            | <b>1.0 M</b> | <b>260</b>    | <b>57</b>   | <b>This work</b> |
| CoSe <sub>2</sub> ultrathin nanosheets                                                   | 1.0 M        | 320           | 44          | 1                |
| Ag-CoSe <sub>2</sub>                                                                     | 1.0 M        | 320           | 56          | 2                |
| CoSe and Co <sub>9</sub> Se <sub>8</sub>                                                 | 1.0 M        | 280           | 40          | 3                |
| NiSe <sub>2</sub> /g-C <sub>3</sub> N <sub>4</sub>                                       | 1.0 M        | 290           | 143         | 4                |
| Ni <sub>3</sub> Se <sub>2</sub>                                                          | 0.3 M        | 280           | 79.5        | 5                |
| Two-tiered NiSe                                                                          | 1.0 M        | 290           | 77          | 6                |
| Cu <sub>2</sub> Se                                                                       | 1.0 M        | 270           | 48          | 7                |
| Ni <sub>3</sub> Se <sub>2</sub>                                                          | 1.0 M        | 290           | 80          | 8                |
| Cu-14-Co <sub>3</sub> Se <sub>4</sub>                                                    | 0.1 M        | 280           | 110         | 9                |
| NiCo <sub>2</sub> Se <sub>4</sub>                                                        | 1.0 M        | 295           | 53          | 10               |
| Co-Ni-Se/carbon/Ni foam                                                                  | 1.0 M        | 275           | 63          | 11               |
| (Co <sub>0.21</sub> Ni <sub>0.25</sub> Cu <sub>0.54</sub> ) <sub>3</sub> Se <sub>2</sub> | 1.0 M        | 272           | 53.3        | 12               |
| ZnNi <sub>0.5</sub> Co <sub>0.5</sub> Se <sub>2</sub> /Cu <sub>1.8</sub> Se@carbon cloth | 1.0 M        | 370           | 72          | 13               |

## 39 References

- 40 1. Y. Liu, H. Cheng, M. Lyu, S. Fan, Q. Liu, W. Zhang, Y. Zhi, C. Wang, C. Xiao, S. Wei, B. Ye and  
41 Y. Xie, *Journal of the American Chemical Society*, 2014, **136**, 15670-15675.
- 42 2. X. Zhao, H. Zhang, Y. Yan, J. Cao, X. Li, S. Zhou, Z. Peng and J. Zeng, *Angewandte Chemie*  
43 *(International ed. in English)*, 2017, **56**, 328-332.
- 44 3. H. Zhou, F. Yu, Y. Liu, J. Sun, Z. Zhu, R. He, J. Bao, W. A. Goddard, S. Chen and Z. Ren, *Energy*  
45 *& Environmental Science*, 2017, **10**, 1487-1492.
- 46 4. S. Wang, P. He, L. Jia, M. He, T. Zhang, F. Dong, M. Liu, H. Liu, Y. Zhang, C. Li, J. Gao and L.  
47 Bian, *Applied Catalysis B: Environmental*, 2019, **243**, 463-469.
- 48 5. A. T. Swesi, J. Masud and M. Nath, *Energy & Environmental Science*, 2016, **9**, 1771-1782.
- 49 6. H. Wu, X. Lu, G. Zheng and G. W. Ho, *Advanced Energy Materials*, 2018, **8**, 1702704.
- 50 7. J. Masud, W. P. R. Liyanage, X. Cao, A. Saxena and M. Nath, *ACS Applied Energy Materials*,  
51 2018, **1**, 4075-4083.
- 52 8. J. Zhang, Y. Wang, C. Zhang, H. Gao, L. Lv, L. Han and Z. Zhang, *ACS Sustainable Chemistry &*  
53 *Engineering*, 2018, **6**, 2231-2239.
- 54 9. J. Dai, D. Zhao, W. Sun, X. Zhu, L.-J. Ma, Z. Wu, C. Yang, Z. Cui, L. Li and S. Chen, *ACS*  
55 *Catalysis*, 2019, **9**, 10761-10772.
- 56 10. Z. Fang, L. Peng, H. Lv, Y. Zhu, C. Yan, S. Wang, P. Kalyani, X. Wu and G. Yu, *ACS nano*, 2017,  
57 **11**, 9550-9557.
- 58 11. F. Ming, H. Liang, H. Shi, X. Xu, G. Mei and Z. Wang, *Journal of Materials Chemistry A*, 2016, **4**,  
59 15148-15155.
- 60 12. X. Cao, E. Johnson and M. Nath, *Journal of Materials Chemistry A*, 2019, **7**, 9877-9889.
- 61 13. H. Hosseini and S. Shahrokhian, *Chemical Engineering Journal*, 2019, **375**, 122090.

62

63
